# Supplementary figures and images for: Efficacy of human umbilical cord mesenchymal stem cell in an animal model of neuromyelitis optica spectrum disorders
Source: Research Square preprint supplement (doi:10.21203/rs.3.rs-5212510/v1), 2024-11-07

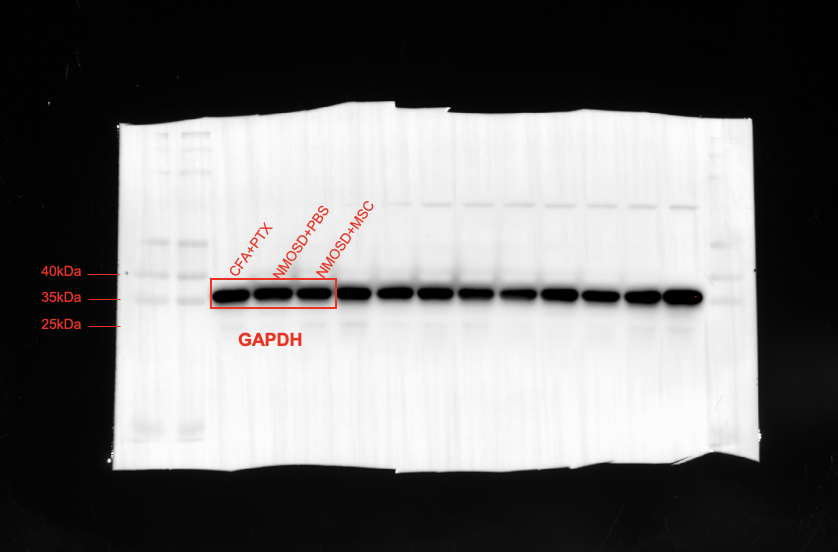


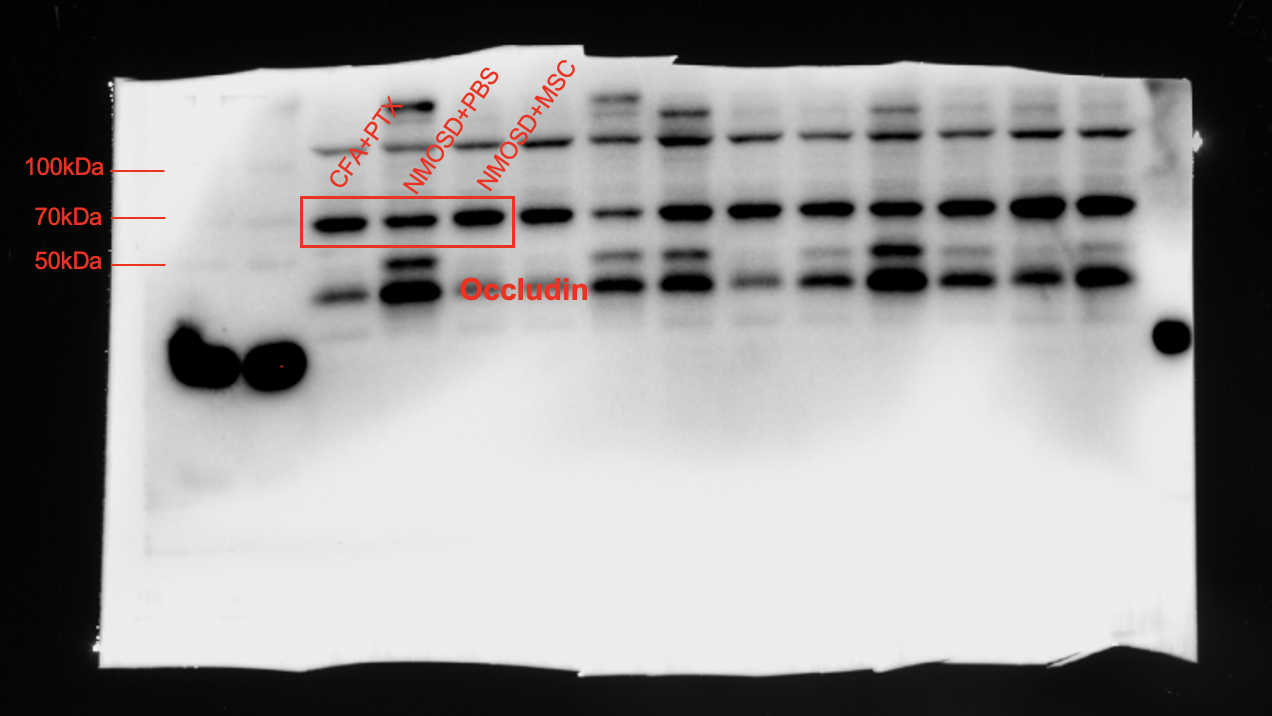

Supplement: Supplementary file 1 [file 638db4b288d5309d270f5f3c.docx]
